# Supplementary material
Source: PubMed Central journal article supplement (PMC3977965)
Supplement: NIHMS569589-supplement-Suppl__Data.pdf [file NIHMS569589-supplement-Suppl__Data.pdf]

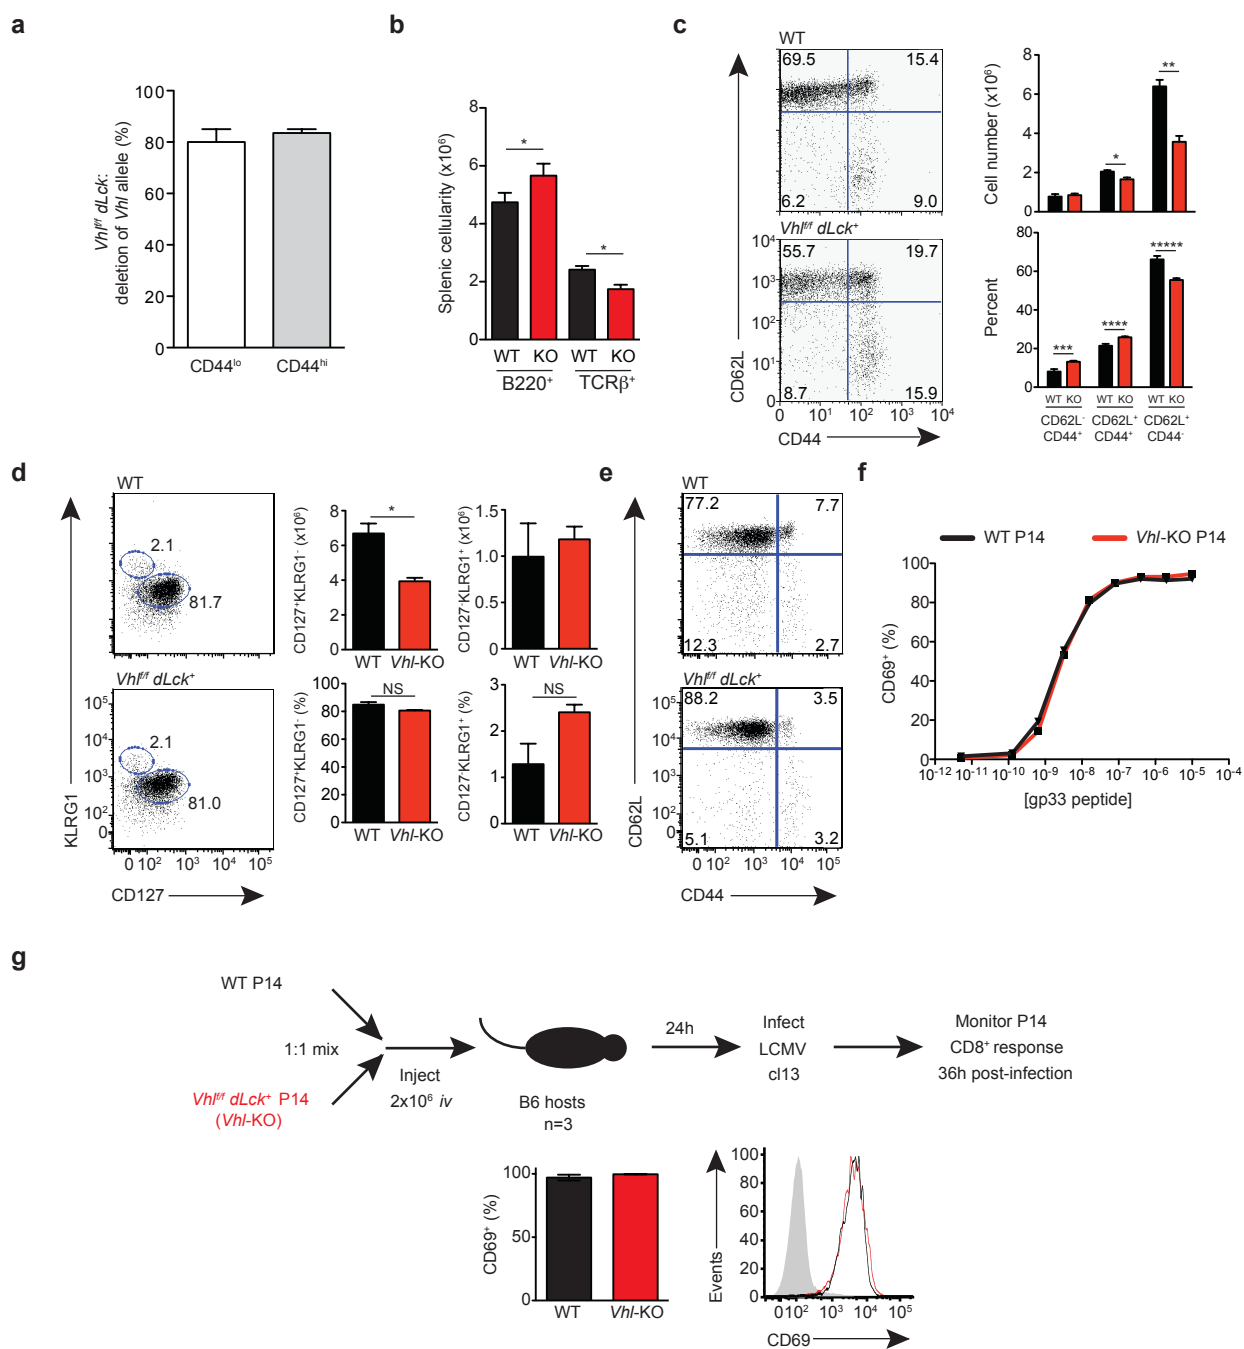

**Supplementary Figure 1.** Deletion of VHL, splenic composition, resting phenotype and TCR responsiveness for the *Vhl*<sup>fl/fl</sup> dLck model. **(a)** Deletion of VHL in gDNA from sorted CD44<sup>lo</sup> and CD44<sup>hi</sup> *Vhl*<sup>fl/fl</sup> dLck (VHL-KO) CD8<sup>+</sup> T cells relative to WT cells as determined by qPCR, n=2, error bars indicate range. **(b)** Absolute number of splenic B220<sup>+</sup> cells and TCRβ<sup>+</sup> cells for wild-type and VHL-KO mice; WT n=6, VHL-KO n=3. \* *P* = 0.014 (Student's unpaired *t*-test). **(c)** Representative CD44 and CD62L phenotype of polyclonal CD8<sup>+</sup>CD4<sup>-</sup> T cells and the absolute number and relative splenic percentage of indicated subsets; WT n=6, VHL-KO n=3, \* *P* = 0.011, \*\* *P* = 0.0011, \*\*\* *P* = 0.033, \*\*\*\* *P* = 0.023 and \*\*\*\*\* *P* = 0.006 (Student's unpaired *t*-test). **(d)** CD127 and KLRG1 phenotype of uninfected splenic polyclonal CD8<sup>+</sup>CD4<sup>-</sup> T cells, number and %; n=3, derived from different mice than **c**; \* *P* = 0.011 (Student's unpaired *t*-test). **(e)** CD44 and CD62L phenotype of splenic P14 (CD8α<sup>+</sup>CD4<sup>-</sup>Vα2<sup>+</sup>) T cells from VHL-sufficient and VHL-deficient P14 TCR transgenic mice. **(f,g)** Equivalent TCR sensitivity/early activation of VHL-sufficient and VHL-deficient P14 T cells to a range of gp33 peptide *in vitro* and to LCMV clone 13 *in vivo*. **(f)** P14 VHL-sufficient or VHL-deficient splenocytes were mixed at a 1:1 ratio and the indicated amount of gp33 peptide was added to duplicate wells. Upregulation of CD69 on VHL-sufficient and VHL-deficient cells was assessed by flow cytometry using congenic markers to distinguish each population after 18 hrs of stimulation; representative of two independent experiments. **(g)** Experimental set up as in **f**, but the mixture of P14 CD8<sup>+</sup> T cells was transferred into B6 mice followed by infection with LCMV clone 13. Splenocytes were analyzed 36 hrs after infection. Grey-filled histogram indicates the fluorescence of naïve CD8<sup>+</sup> T cells from uninfected mice; n=3, representative of two independent experiments. Error bars indicate s.e.m.

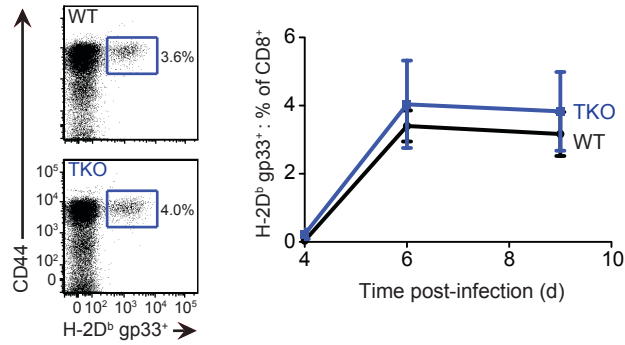

**Supplementary Figure 2.** Similar virus-specific CTL accumulation in T cell-specific triple VHL-HIF-1 $\alpha$ -HIF-2 $\alpha$ -deficient mice. Wild-type and VHL-HIF-1 $\alpha$ -HIF-2 $\alpha$  dLck mice were infected with LCMV clone 13. Frequency of H-2D<sup>b</sup> gp33 tetramer-positive cells in the peripheral blood for representative samples on day 6 of infection (left) or at the time points indicated (right); n=3, error bars indicate s.e.m., representative of two experiments.

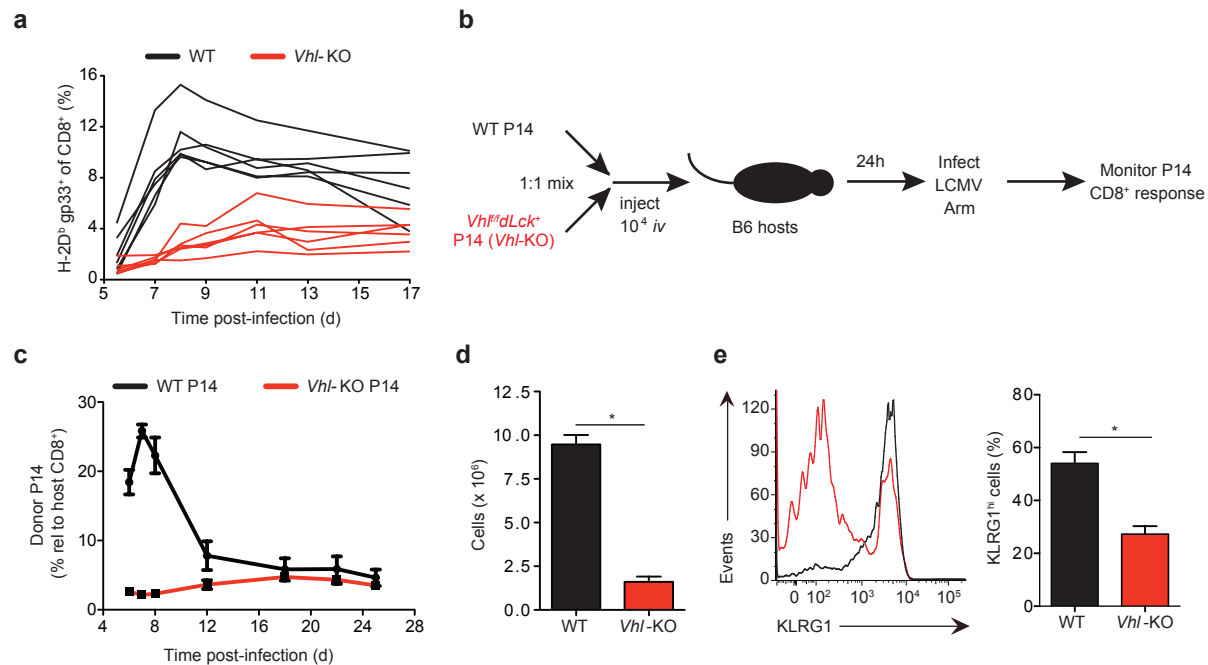

**Supplementary Figure 3.** VHL-sufficient and VHL-deficient CD8<sup>+</sup> T cell response to acute viral infection. **(a)** Wild-type or *Vhl*<sup>fl/fl</sup> dLck (VHL-KO) mice were infected with LCMV Armstrong and the CD8<sup>+</sup> T cell response in peripheral blood was monitored with MHC class I H-2D<sup>b</sup> gp33 tetramers to detect LCMV-specific CD8<sup>+</sup> T cells. Each line indicates an individual mouse; n=6, representative of two experiments. **(b-e)**, A 1:1 mixture of 10<sup>4</sup> VHL-sufficient and VHL-deficient P14 CD8<sup>+</sup> T cells were transferred to B6 hosts followed by infection with LCMV Armstrong one day later; n=3, error bars indicate s.e.m. **(b)** Experimental scheme. **(c)** Frequency of transferred VHL-sufficient and VHL-deficient P14 virus-specific cells in peripheral blood as a % of host CD8<sup>+</sup> T cells. **(d)** Absolute number of VHL-sufficient and -deficient P14 splenocytes on day 8 of infection, \* *P* = 0.0002, (Student's unpaired *t*-test) **(e)** KLRG1 expression by VHL-sufficient and VHL-deficient P14 cells on day 7 of infection; n=3, \* *P* = 0.007 (Student's unpaired *t*-test). Results representative of three independent experiments.

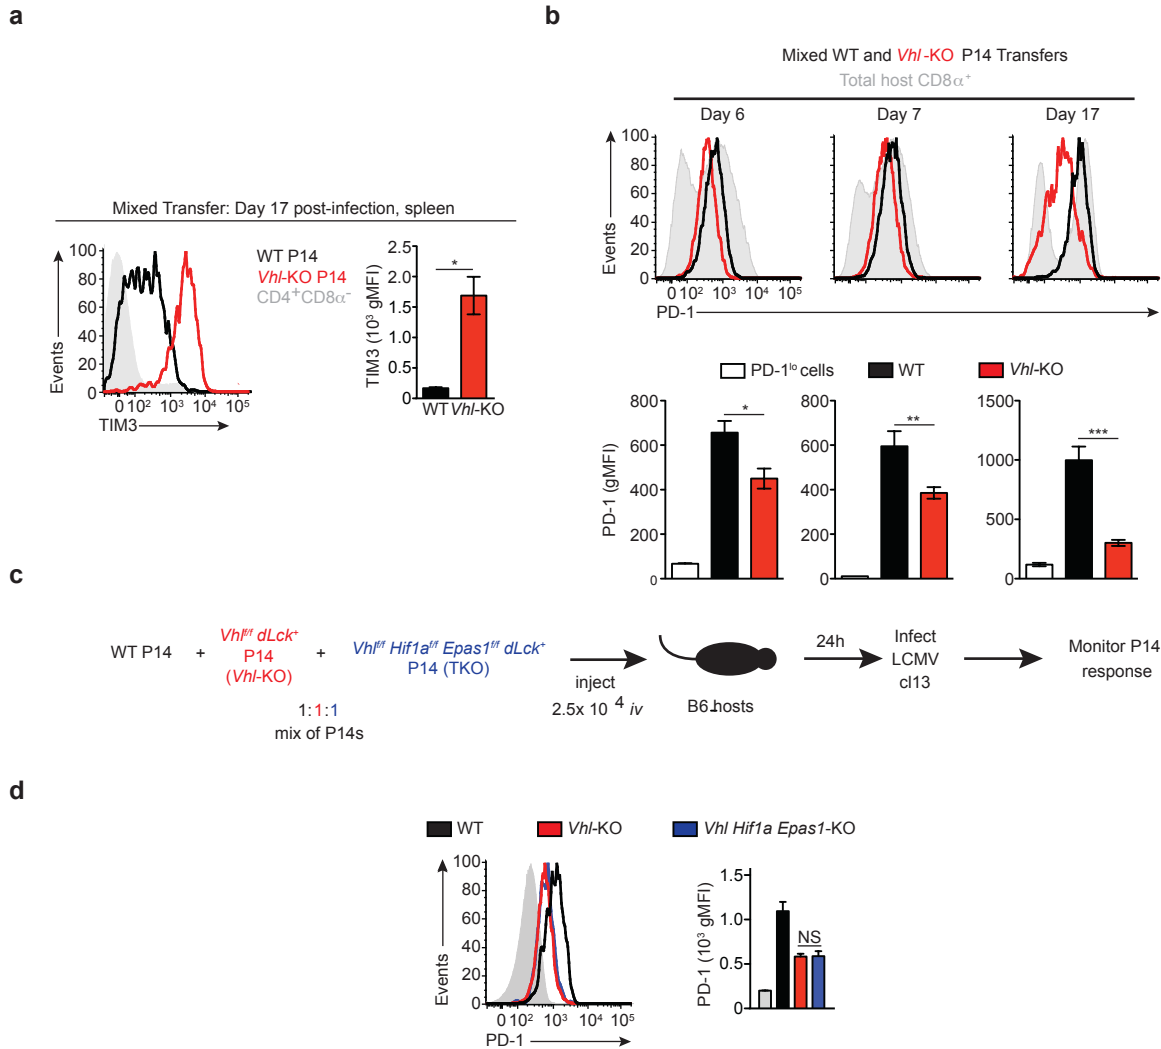

**Supplementary Figure 4.** Inhibitory and exhaustion-associated TIM-3 is increased on VHL-deficient cells and reduced PD-1 expression on VHL-deficient cells is HIF-1 $\alpha$ -HIF-2 $\alpha$  independent and VHL-dependent. **(a)** Cotransfer of VHL-sufficient and VHL-deficient P14 CD8<sup>+</sup> T cells followed by LCMV clone 13 infection as in Fig. 2a; histograms of TIM-3 expression and gMFIs of P14 CD8<sup>+</sup> T cells from spleen on day 17 of infection with LCMV clone 13; n=4, \*  $P = 0.008$  (Student's unpaired  $t$ -test). **(b)** Cotransfer of VHL-sufficient and VHL-deficient P14 CD8<sup>+</sup> T cells followed by LCMV clone 13 infection as in Fig. 2a; flow cytometric analysis of splenic VHL-sufficient P14 (black) or VHL-deficient P14 (red) CD8<sup>+</sup> T cells at the indicated time points, gMFI shown below. Expression of PD-1 on total host CD8 $\alpha$ <sup>+</sup> T cells excluding P14 donor cells (histograms, grey), or gMFI for PD-1 low – expressing cells (in graphs, open bars) shown for reference; n=3, \*  $P = 0.004$ , \*\*  $P = 0.05$  and \*\*\*  $P = 0.004$  (Student's unpaired  $t$ -test). **(c)** Experimental design for a mixed transfer of VHL-sufficient, VHL-deficient and VHL-HIF-1 $\alpha$ -HIF-2 $\alpha$ -triple-deficient P14 CD8<sup>+</sup> donor cells. **(d)** Histogram of each donor population displaying PD-1 (left) and gMFI graphed (right); peripheral blood on day 7 of infection; n=3, error bars indicate s.e.m.

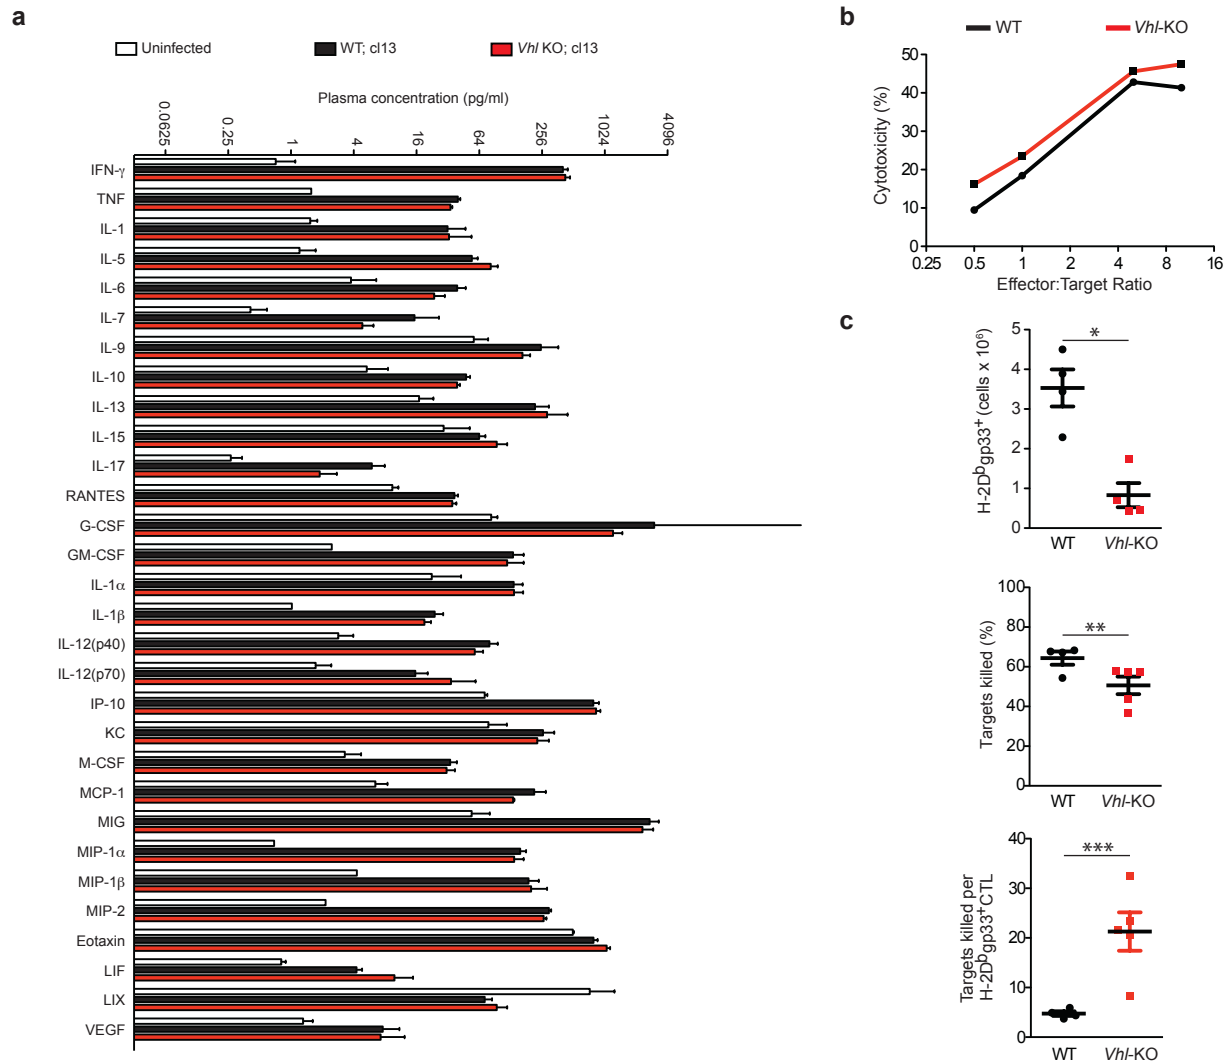

**Supplementary Figure 5.** Similar plasma cytokine levels in wild-type and *Vhl*<sup>f/f</sup> dLck mice responding to persistent infection and *in vitro* and *in vivo* cytotoxicity assays of VHL-sufficient and VHL-deficient cells responding to persistent infection. **(a)** Plasma cytokine levels in uninfected, polyclonal wild-type, or polyclonal *Vhl*<sup>f/f</sup> dLck on day 6 of infection with LCMV clone 13; uninfected n=2, wild-type n=5, *Vhl*<sup>f/f</sup> dLck n = 4; error bars indicate s.e.m. Cytokine levels were determined using Milliplex 32-plex premixed magnetic cytokine array and Luminex bead reader according to the manufacturers instructions. **(b)** *In vitro* cytotoxicity assay: VHL-sufficient P14 (here designated as WT) or VHL-deficient P14 T cells (VHL-KO) were transferred into B6 hosts that were then infected with LCMV clone 13 as in Fig. 1a. Splenocytes from hosts harboring VHL-sufficient or VHL-deficient P14 cells were enriched for CD8<sup>+</sup> cells on day 7 of LCMV clone 13 infection. Whole splenocytes from an uninfected mouse were used as targets; cells were coated with gp33-41 peptide (KAVYNFATC) at 1 $\mu$ m for one hour, labeled with 5 $\mu$ m of eFluor670 and mixed 1:1 with splenocytes labeled with 250nM of eFluor670. Appropriate numbers of VHL-sufficient or VHL-deficient P14 T cells were added to achieve effector to target ratios indicated, incubated with target cells for 4 hrs, and then assayed by flow cytometry. **(c)** *In vivo* cytotoxicity assay: VHL-sufficient versus VHL-deficient P14 T cells were transferred into B6 hosts and infected with LCMV clone 13. Whole splenocytes coated with or without gp33 peptide and eFluor670 labeled as in **b**, 2.5  $\times 10^6$  gp33 peptide coated cells per mouse were injected *iv* 16 days after infection. One hour after injection of target cell mix, splenocytes were isolated from host mice and assayed by flow cytometry. The absolute number of cells binding H-2D<sup>b</sup> gp33 tetramer (top), the % killing of target cells (middle) and the approximate killing per antigen-specific CD8<sup>+</sup> T cell (bottom) are shown. To calculate targets killed per antigen-specific cell: the number of peptide-coated cells transferred to the infected host mouse was multiplied by the % killed to obtain an estimate of absolute number killed. The absolute number of target cells killed was then divided by the number of H-2D<sup>b</sup> gp33 tetramer<sup>+</sup> CD8<sup>+</sup> T cells per host spleen to approximate killing per cell. \*  $P = 0.003$ , \*\*  $P = 0.05$  and \*\*\*  $P = 0.007$  (Student's unpaired *t*-test). Error bars indicate s.e.m. for all plots.

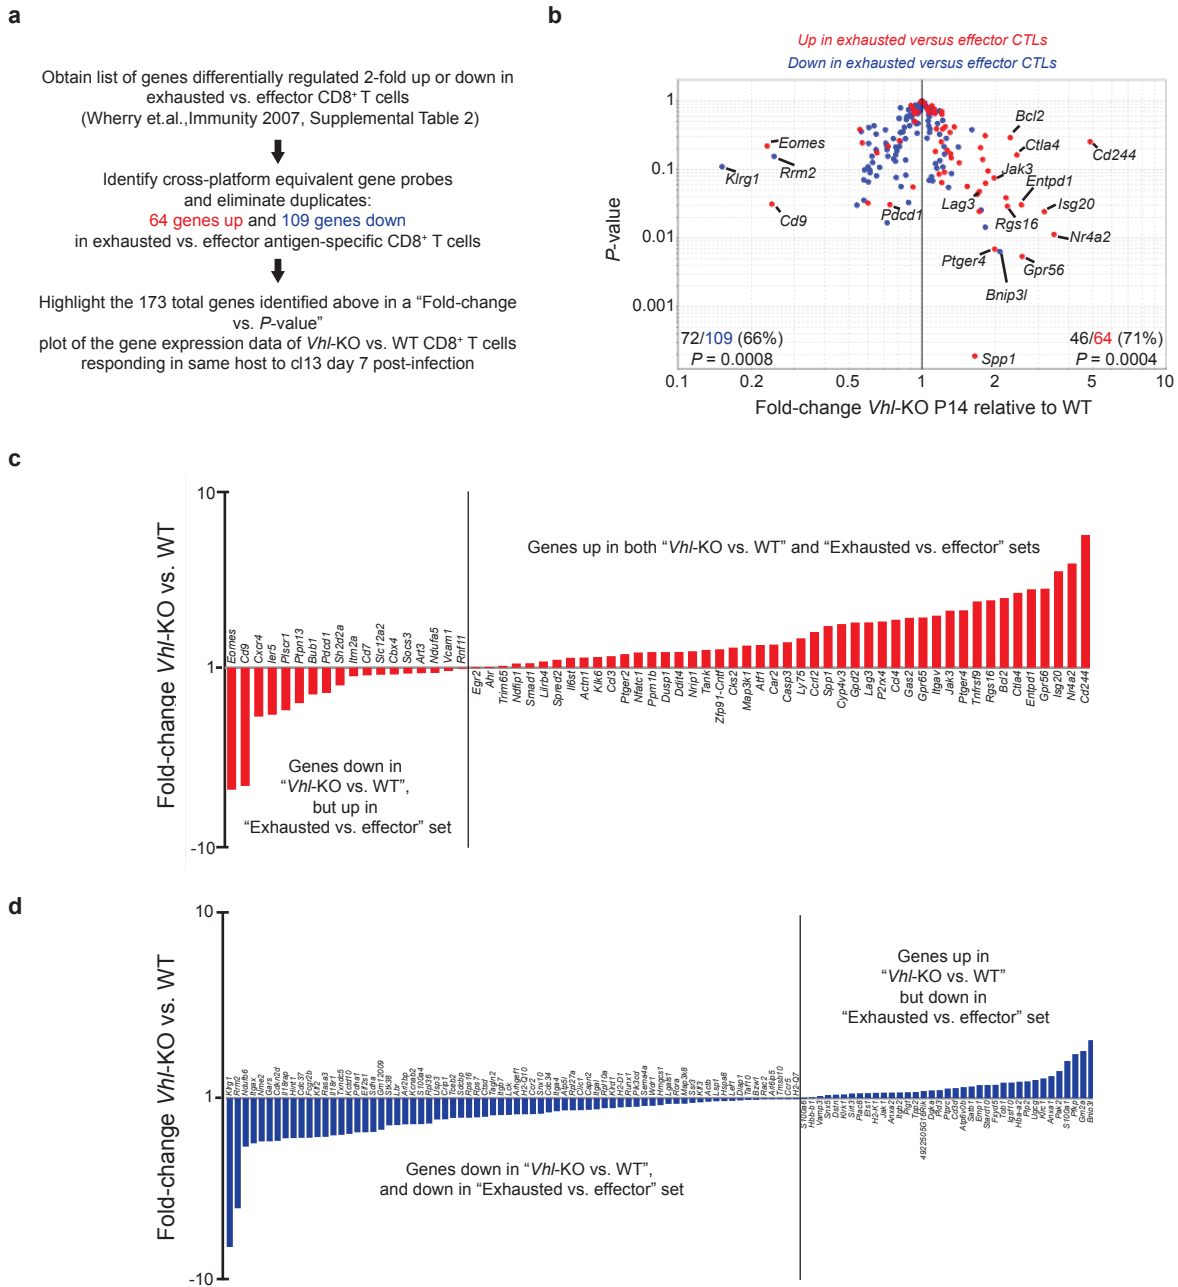

**Supplementary Figure 6.** Comparison of established "exhaustion gene-expression profile" with VHL-deficient-expression profile shows significant correlation, but identifies differently expressed genes. (a) Flow chart of analysis. (b) Fold-change versus *P*-value plot of VHL-deficient versus VHL-sufficient P14 cells at day 7 post-infection (data from Fig. 3a). Genes that were reported<sup>1</sup> to be upregulated in wild-type exhausted versus wild-type effector cells are highlighted in red, those down in blue; selected genes are identified. Genes up- or downregulated in VHL-deficient versus VHL-sufficient P14 cells show significant correlation with the genes previously reported to be up- or downregulated with exhausted versus effector cells ( $P = 0.0008$  and  $0.0004$ , respectively); Chi-squared test assuming equal distribution of genes up- and downregulated for the VHL-deficient versus VHL-sufficient and exhausted versus effector comparisons. (c) Bar graph representation of the data in a,b identifying the 64 genes that were upregulated in exhausted versus effector CTL; fold-change for VHL-deficient versus VHL-sufficient P14 cells is plotted. (d) As in c, but the fold-change expression of VHL-deficient versus VHL-sufficient of the 109 genes identified in a,b as being downregulated in exhausted versus effector cells.

Supplementary References:

1. Wherry, E.J., et al. Molecular signature of CD8<sup>+</sup> T cell exhaustion during chronic viral infection. *Immunity* 27, 670-684 (2007).
